# Supplementary material
Source: PubMed Central journal article supplement (PMC5076788)
Supplement: Legend_for_the_Supplementary_Movie_1.pdf [file Legend_for_the_Supplementary_Movie_1.pdf]

Supplementary Movie 1. Representative run videos from a control and an acute-phase ARE rat analyzed by CatWalk XT.
