# Supplementary material
Source: PubMed Central journal article supplement (PMC5076788)
Supplement: Supplementary_Figure_1.pdf [file Supplementary_Figure_1.pdf]

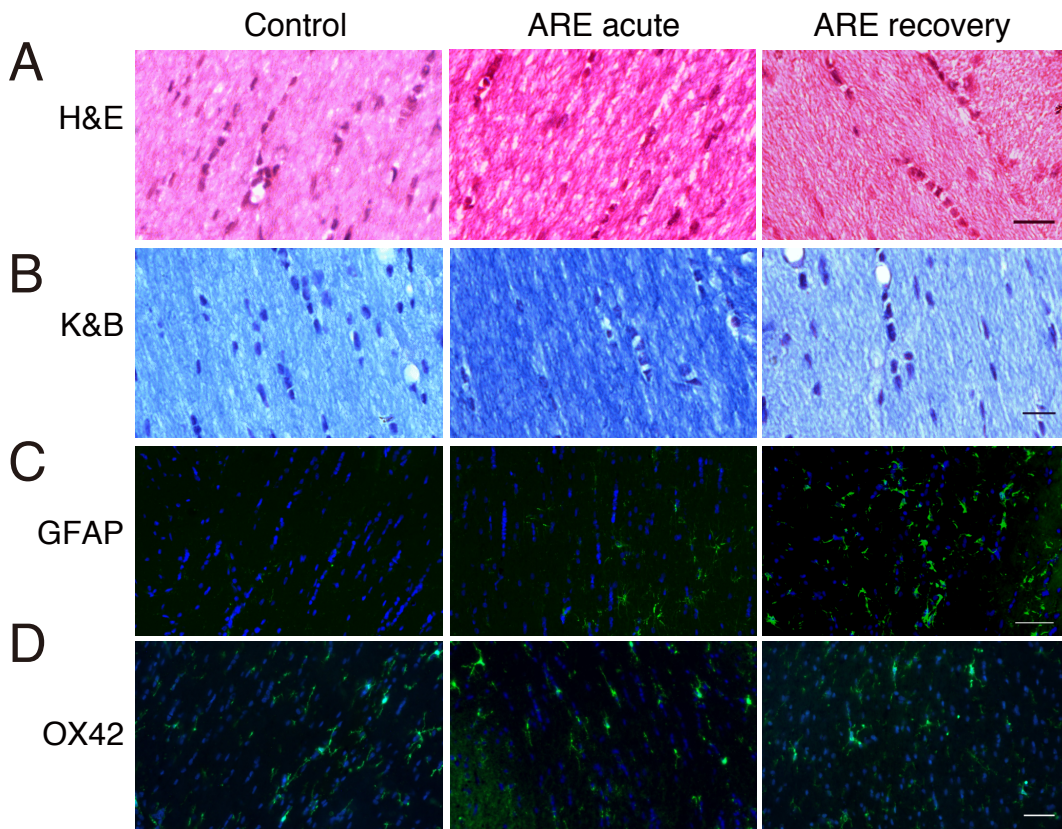

Supplementary Figure 1 **Histological analyses of Brain lesions of ARE model.** (A) H&E staining of corpus callosum from control, acute- and recovery-phase ARE animals. (B-D) (B) K&B, (C) GFAP, a marker for reactive astrocytes, and (D) OX-42, a marker for microglia, staining of corpus callosum from acute- and recovery-phase ARE and control animals. Panels (C) through (D) show merged images with DAPI. Scale bars indicate (A, B) 20  $\mu$ m, (C, D) 50 $\mu$ m.
